# Supplementary material for: Morphology and Molecular Identification of Twelve Commercial Varieties of Kiwifruit
Source: Molecules. 2019 Mar 3;24(5):888. doi: 10.3390/molecules24050888 (PMC6429161; doi:10.3390/molecules24050888)
Supplement: Supplementary file 1 [file molecules-24-00888-s001.zip]

Archive with 8 entries (8 files):
- Supplementary Figure 1.tif
- Supplementary Figure 2_Phylogenetic analysis of 12 kiwifruit commercial varieties.pdf
- Supplementary Table 1_Phenotypic characteristics of twelve commercial varieties of kiwifruit.xlsx
- Supplementary Table 2_ITS2 sequence of 72 kiwifruit samples.xls
- Supplementary Table 3_matK sequence of 72 kiwifruit samples.xls
- Supplementary Table 4_rpl32-trnL(UAG) sequence of 72 kiwifruit samples.xls
- Supplementary Table 5_ genetic distance.pdf
- Supplementary Table 6_The information of the experimental materials.pdf
