# Supplementary material for: Morphology and Molecular Identification of Twelve Commercial Varieties of Kiwifruit
Source: Molecules. 2019 Mar 3;24(5):888. doi: 10.3390/molecules24050888 (PMC6429161; doi:10.3390/molecules24050888)
Supplement: Supplementary file 1 [file molecules-24-00888-s001.zip › Supplementary Table 1_Phenotypic characteristics of twelve commercial varieties of kiwifruit.xlsx]

## Sheet: Sheet1
					Supplementary Table 1. Phenotypic characteristics of twelve commercial varieties of kiwifruit
				Fruit size			Fruit skin		Hair				Fruit Flesh		seed			beak (top)		Picking time	Ploidy
No.	Name	Fruit type	Fruit shape	Length(mm)	Width(mm)	Side(mm)	Fruit spots (Y/N)	Skin color	Hairy (Y/N)	Hair length(mm)	Hair hardness	Easy abscission (Y/N)	Fruit color	Fruit taste	Color	number (2mm thickness)	shape	shape protrusion (Y/N)	length(mm)	(After pollination days)	Ploidy
1	Huang Jin Guo	bacca	long oval	62.5±5	44±5	41±5	Y	yellow-brown	N	N/A	N/A	N/A	yellow	sweet	black-brown	23.8±5	Oblate ovate	Y	18.1±2	150-160	4
2	Cuii Xiang	bacca	Oblate	60.2±5	43.1±5	41.3±5	Y	brown	Y	0.4±0.05	Hard	Y	green	sweet	brown	76.6±5	Oblate ovate	N	5.2±2	150-160	4
3	Qin Mei	bacca	Cylindrical spherical shape	49.9±5	45.6±5	44.6±5	Y	green-brown	Y dense	0.4±0.05	Hard	Y	green	sour-sweet	black	116.5±5	Oblate ovate	Y	12.3±2	150-160	unknown
4	Xu Xiang	bacca	Cylindrical spherical shape	51.2±5	46.7±5	42.4±5	Y	yellow-brown	Y	0.7±0.05	fuzz	N	green	sour-sweet	black-brown	93.7±5	Oblate ovate	Y	6.3±2	150-160	4
5	Hua You	bacca	Cylindrical spherical shape	49.5±5	46.2±5	41.9±5	Y	brown	Y sparse	0.12±0.05	Soft	Y	yellow-green	sweet	black-brown	58.3±5	Oblate ovate	Y	6.6±2	150-160	4
6	Feng Xian Lou	bacca	Cylindrical spherical shape	65.6±5	43.9±5	43.1±5	Y	dark brown	Y	1.2±0.05	Soft	Y	green	sour-sweet	black-brown	45.5±5	Oblate ovate	Y	6.2±2	150-160	unknown
7	Ya Te	bacca	Cylindrical	52.3±5	45.1±5	44.3±5	Y	brown	Y	0.3±0.05	Hard	Y	green	sour-sweet	brown	118.7±5	Oblate ovate	Y	6.1±2	150-160	unknown
8	Hai Wo De	bacca	Cylindrical spherical shape	52.8±5	45.3±5	44.9±5	Y	brown	Y dense	0.8±0.05	Soft	N	green	sour-sweet	black	126.3±5	Oblate ovate	Y	6.4±2	150-160	6
9	Cui Yu	bacca	Oblate cone	52.3±5	42.2±5	40.4±5	N	yellow-brown	N	N/A	N/A	N/A	emerald green	sweet	black-brown	120.7±5	Oblate ovate	Y	8.4±2	150-160	4
10	Chuan Huang Jin	bacca	long oval	57.3±5	43.1±5	40.5±5	Y	yellow-brown	N	N/A	N/A	N/A	gold-yellow	sweet	black-brown	68.5±5	Oblate ovate	Y	7.2±2	150-160	4
11	Hong Yang	bacca	Short cylindrical	45.9±5	38.5±5	37.9±5	Y	green	N	N/A	N/A	N/A	yellow-Red	sour-sweet	green-brown	76.2±5	Oblate ovate	N	3.1±2	150-160	2
12	Jin Yan	bacca	Cylindrical	50.9±5	41.8±5	42.1±5	Y	yellow	Y	0.15±0.05	Soft	Y	yellow	sweet	yellow-brown	45.9±5	Oblate ovate	Y	3.5±2	150-160	4
