# Supplementary material for: Morphology and Molecular Identification of Twelve Commercial Varieties of Kiwifruit
Source: Molecules. 2019 Mar 3;24(5):888. doi: 10.3390/molecules24050888 (PMC6429161; doi:10.3390/molecules24050888)
Supplement: Supplementary file 1 [file molecules-24-00888-s001.zip › Supplementary Table 5_ genetic distance.pdf]

**Supplementary Table 5c.** Pairwise divergences of *rpl32\_trnL(UAG)* fragment among twelve kiwi commercial varieties

|               | Hua<br>You | Hong<br>Yang | CuiYu | JinYan | Cui<br>Xiang | YaTe  | Feng<br>Xian<br>Lou | Chuan<br>Huang<br>Jin | HaiWo<br>De | QinMei | Huang<br>JinGuo | Xu<br>Xiang |
|---------------|------------|--------------|-------|--------|--------------|-------|---------------------|-----------------------|-------------|--------|-----------------|-------------|
| HuaYou        |            |              |       |        |              |       |                     |                       |             |        |                 |             |
| HongYang      | 0.003      |              |       |        |              |       |                     |                       |             |        |                 |             |
| CuiYu         | 0.004      | 0.003        |       |        |              |       |                     |                       |             |        |                 |             |
| JinYan        | 0.002      | 0.001        | 0.002 |        |              |       |                     |                       |             |        |                 |             |
| CuiXiang      | 0.002      | 0.001        | 0.002 | 0.000  |              |       |                     |                       |             |        |                 |             |
| YaTe          | 0.003      | 0.002        | 0.003 | 0.001  | 0.001        |       |                     |                       |             |        |                 |             |
| FengXianLou   | 0.002      | 0.001        | 0.002 | 0.000  | 0.000        | 0.001 |                     |                       |             |        |                 |             |
| ChuanHuangJin | 0.002      | 0.001        | 0.002 | 0.000  | 0.000        | 0.001 | 0.000               |                       |             |        |                 |             |
| HaiWoDe       | 0.002      | 0.001        | 0.002 | 0.000  | 0.000        | 0.001 | 0.000               | 0.000                 |             |        |                 |             |
| QinMei        | 0.002      | 0.001        | 0.002 | 0.000  | 0.000        | 0.001 | 0.000               | 0.000                 | 0.000       |        |                 |             |
| HuangJinGuo   | 0.002      | 0.001        | 0.002 | 0.000  | 0.000        | 0.001 | 0.000               | 0.000                 | 0.000       | 0.000  |                 |             |
| XuXiang       | 0.003      | 0.002        | 0.003 | 0.001  | 0.001        | 0.002 | 0.001               | 0.001                 | 0.001       | 0.001  | 0.001           |             |

**Supplementary Table 5d.** Pairwise divergences of *ITS2+matK+rpl32\_trnL(UAG)* fragment among twelve kiwi commercial varieties

|               | YaTe  | JinYan | Xu<br>Xiang | QinM<br>ei | HaiWo<br>De | Cui<br>Xiang | HuaY<br>ou | Feng<br>Xian<br>Lou | CuiYu | Huang<br>Jin<br>Guo | Hong<br>Yang | Chuan<br>Huang<br>Jin |
|---------------|-------|--------|-------------|------------|-------------|--------------|------------|---------------------|-------|---------------------|--------------|-----------------------|
| YaTe          |       |        |             |            |             |              |            |                     |       |                     |              |                       |
| JinYan        | 0.001 |        |             |            |             |              |            |                     |       |                     |              |                       |
| XuXiang       | 0.001 | 0.001  |             |            |             |              |            |                     |       |                     |              |                       |
| QinMei        | 0.000 | 0.000  | 0.000       |            |             |              |            |                     |       |                     |              |                       |
| HaiWoDe       | 0.000 | 0.000  | 0.000       | 0.000      |             |              |            |                     |       |                     |              |                       |
| CuiXiang      | 0.000 | 0.000  | 0.000       | 0.000      | 0.000       |              |            |                     |       |                     |              |                       |
| HuaYou        | 0.001 | 0.001  | 0.001       | 0.001      | 0.001       | 0.001        |            |                     |       |                     |              |                       |
| FengXianLou   | 0.000 | 0.000  | 0.000       | 0.000      | 0.000       | 0.000        | 0.001      |                     |       |                     |              |                       |
| CuiYu         | 0.002 | 0.002  | 0.002       | 0.001      | 0.001       | 0.001        | 0.002      | 0.001               |       |                     |              |                       |
| HuangJinGuo   | 0.003 | 0.003  | 0.003       | 0.002      | 0.002       | 0.002        | 0.003      | 0.002               | 0.003 |                     |              |                       |
| HongYang      | 0.003 | 0.003  | 0.003       | 0.003      | 0.003       | 0.003        | 0.003      | 0.003               | 0.004 | 0.000               |              |                       |
| ChuanHuangJin | 0.003 | 0.003  | 0.003       | 0.002      | 0.002       | 0.002        | 0.003      | 0.002               | 0.003 | 0.000               | 0.000        |                       |
