# Supplementary material for: Morphology and Molecular Identification of Twelve Commercial Varieties of Kiwifruit
Source: Molecules. 2019 Mar 3;24(5):888. doi: 10.3390/molecules24050888 (PMC6429161; doi:10.3390/molecules24050888)
Supplement: Supplementary file 1 [file molecules-24-00888-s001.zip › Supplementary Table 6_The information of the experimental materials.pdf]

**Supplementary Table 6.** The information of the experimental materials.

| serial<br>number | Variety | source      | Sequence<br>length (bp) | Sequence<br>length (bp) | Sequence length<br>(bp) |             | haplotype |
|------------------|---------|-------------|-------------------------|-------------------------|-------------------------|-------------|-----------|
|                  |         |             |                         |                         | <i>ITS2</i>             | <i>matK</i> |           |
| 1                | 1-1     | HuangJinGuo | ZhouZhi, Shaanxi        | 491                     | 889                     | 1010        | A1        |
| 2                | 1-2     | HuangJinGuo | ZhouZhi, Shaanxi        | 491                     | 889                     | 1010        | A1        |
| 3                | 1-3     | HuangJinGuo | ZhouZhi, Shaanxi        | 491                     | 889                     | 1010        | A1        |
| 4                | 1-4     | HuangJinGuo | ZhouZhi, Shaanxi        | 491                     | 889                     | 1010        | A1        |
| 5                | 1-5     | HuangJinGuo | ZhouZhi, Shaanxi        | 491                     | 889                     | 1010        | A1        |
| 6                | 1-6     | HuangJinGuo | ZhouZhi, Shaanxi        | 491                     | 889                     | 1010        | A1        |
| 7                | 2-1     | CuiXiang    | ZhouZhi, Shaanxi        | 491                     | 889                     | 1010        | B1        |
| 8                | 2-2     | CuiXiang    | ZhouZhi, Shaanxi        | 491                     | 889                     | 1010        | B1        |
| 9                | 2-3     | CuiXiang    | ZhouZhi, Shaanxi        | 491                     | 889                     | 1010        | B1        |
| 10               | 2-4     | CuiXiang    | ZhouZhi, Shaanxi        | 491                     | 889                     | 1010        | B1        |
| 11               | 2-5     | CuiXiang    | ZhouZhi, Shaanxi        | 491                     | 889                     | 1010        | B1        |
| 12               | 2-6     | CuiXiang    | ZhouZhi, Shaanxi        | 491                     | 889                     | 1010        | B1        |
| 13               | 3-1     | QinMei      | ZhouZhi, Shaanxi        | 491                     | 889                     | 1010        | B1        |
| 14               | 3-2     | QinMei      | ZhouZhi, Shaanxi        | 491                     | 889                     | 1010        | B1        |
| 15               | 3-3     | QinMei      | ZhouZhi, Shaanxi        | 491                     | 889                     | 1010        | B1        |
| 16               | 3-4     | QinMei      | ZhouZhi, Shaanxi        | 491                     | 889                     | 1010        | B1        |
| 17               | 3-5     | QinMei      | ZhouZhi, Shaanxi        | 491                     | 889                     | 1010        | B1        |
| 18               | 3-6     | QinMei      | ZhouZhi, Shaanxi        | 491                     | 889                     | 1010        | B1        |
| 19               | 4-1     | XuXiang     | ZhouZhi, Shaanxi        | 491                     | 889                     | 1010        | C1        |
| 20               | 4-2     | XuXiang     | ZhouZhi, Shaanxi        | 491                     | 889                     | 1010        | C1        |
| 21               | 4-3     | XuXiang     | ZhouZhi, Shaanxi        | 491                     | 889                     | 1010        | C1        |
| 22               | 4-4     | XuXiang     | ZhouZhi, Shaanxi        | 491                     | 889                     | 1010        | C1        |
| 23               | 4-5     | XuXiang     | ZhouZhi, Shaanxi        | 491                     | 889                     | 1010        | C1        |
| 24               | 4-6     | XuXiang     | ZhouZhi, Shaanxi        | 491                     | 889                     | 1010        | C1        |
| 25               | 5-1     | HuaYou      | ZhouZhi, Shaanxi        | 491                     | 889                     | 1010        | D1        |
| 26               | 5-2     | HuaYou      | ZhouZhi, Shaanxi        | 491                     | 889                     | 1010        | D1        |
| 27               | 5-3     | HuaYou      | ZhouZhi, Shaanxi        | 491                     | 889                     | 1010        | D1        |
| 28               | 5-4     | HuaYou      | ZhouZhi, Shaanxi        | 491                     | 889                     | 1010        | D1        |
| 29               | 5-5     | HuaYou      | ZhouZhi, Shaanxi        | 491                     | 889                     | 1010        | D1        |
| 30               | 5-6     | HuaYou      | ZhouZhi, Shaanxi        | 491                     | 889                     | 1010        | D1        |
| 31               | 6-1     | FengXianLou | MeiXian, Shaanxi        | 491                     | 889                     | 1010        | B1        |
| 32               | 6-2     | FengXianLou | MeiXian, Shaanxi        | 491                     | 889                     | 1010        | B1        |
| 33               | 6-3     | FengXianLou | MeiXian, Shaanxi        | 491                     | 889                     | 1010        | B1        |
| 34               | 6-4     | FengXianLou | MeiXian, Shaanxi        | 491                     | 889                     | 1010        | B1        |
| 35               | 6-5     | FengXianLou | MeiXian, Shaanxi        | 491                     | 889                     | 1010        | B1        |
| 36               | 6-6     | FengXianLou | MeiXian, Shaanxi        | 491                     | 889                     | 1010        | B1        |

| serial<br>number |      | Variety       | source           | Sequence<br>length (bp)<br><i>ITS2</i> | Sequence<br>length (bp)<br><i>matK</i> | Sequence<br>length (bp)<br><i>rpl32</i> | haplotype |
|------------------|------|---------------|------------------|----------------------------------------|----------------------------------------|-----------------------------------------|-----------|
| 37               | 7-1  | YaTe          | MeiXian, Shaanxi | 491                                    | 889                                    | 1010                                    | E1        |
| 38               | 7-2  | YaTe          | MeiXian, Shaanxi | 491                                    | 889                                    | 1010                                    | E1        |
| 39               | 7-3  | YaTe          | MeiXian, Shaanxi | 491                                    | 889                                    | 1010                                    | E1        |
| 40               | 7-4  | YaTe          | MeiXian, Shaanxi | 491                                    | 889                                    | 1010                                    | E1        |
| 41               | 7-5  | YaTe          | MeiXian, Shaanxi | 491                                    | 889                                    | 1010                                    | E1        |
| 42               | 7-6  | YaTe          | MeiXian, Shaanxi | 491                                    | 889                                    | 1010                                    | E1        |
| 43               | 8-1  | HaiWoDe       | ZhouZhi, Shaanxi | 491                                    | 889                                    | 1010                                    | B1        |
| 44               | 8-2  | HaiWoDe       | ZhouZhi, Shaanxi | 491                                    | 889                                    | 1010                                    | B1        |
| 45               | 8-3  | HaiWoDe       | ZhouZhi, Shaanxi | 491                                    | 889                                    | 1010                                    | B1        |
| 46               | 8-4  | HaiWoDe       | ZhouZhi, Shaanxi | 491                                    | 889                                    | 1010                                    | B1        |
| 47               | 8-5  | HaiWoDe       | ZhouZhi, Shaanxi | 491                                    | 889                                    | 1010                                    | B1        |
| 48               | 8-6  | HaiWoDe       | ZhouZhi, Shaanxi | 491                                    | 889                                    | 1010                                    | B1        |
| 49               | 9-1  | CuiYu         | PuYang, SiChuan  | 491                                    | 889                                    | 1010                                    | F1        |
| 50               | 9-2  | CuiYu         | PuYang, SiChuan  | 491                                    | 889                                    | 1010                                    | F1        |
| 51               | 9-3  | CuiYu         | PuYang, SiChuan  | 491                                    | 889                                    | 1010                                    | F1        |
| 52               | 9-4  | CuiYu         | PuYang, SiChuan  | 491                                    | 889                                    | 1010                                    | F1        |
| 53               | 9-5  | CuiYu         | PuYang, SiChuan  | 491                                    | 889                                    | 1010                                    | F1        |
| 54               | 9-6  | CuiYu         | PuYang, SiChuan  | 491                                    | 889                                    | 1010                                    | F1        |
| 55               | 10-1 | ChuanHuangJin | PuYang, SiChuan  | 491                                    | 889                                    | 1010                                    | A1        |
| 56               | 10-2 | ChuanHuangJin | PuYang, SiChuan  | 491                                    | 889                                    | 1010                                    | A1        |
| 57               | 10-3 | ChuanHuangJin | PuYang, SiChuan  | 491                                    | 889                                    | 1010                                    | A1        |
| 58               | 10-4 | ChuanHuangJin | PuYang, SiChuan  | 491                                    | 889                                    | 1010                                    | A1        |
| 59               | 10-5 | ChuanHuangJin | PuYang, SiChuan  | 491                                    | 889                                    | 1010                                    | A1        |
| 60               | 10-6 | ChuanHuangJin | PuYang, SiChuan  | 491                                    | 889                                    | 1010                                    | A1        |
| 61               | 11-1 | HongYang      | PuYang, SiChuan  | 491                                    | 889                                    | 1010                                    | G1        |
| 62               | 11-2 | HongYang      | PuYang, SiChuan  | 491                                    | 889                                    | 1010                                    | G1        |
| 63               | 11-3 | HongYang      | PuYang, SiChuan  | 491                                    | 889                                    | 1010                                    | G1        |
| 64               | 11-4 | HongYang      | PuYang, SiChuan  | 491                                    | 889                                    | 1010                                    | G1        |
| 65               | 11-5 | HongYang      | PuYang, SiChuan  | 491                                    | 889                                    | 1010                                    | G1        |
| 66               | 11-6 | HongYang      | PuYang, SiChuan  | 491                                    | 889                                    | 1010                                    | G1        |
| 67               | 12-1 | JinYan        | PuYang, SiChuan  | 491                                    | 889                                    | 1010                                    | H1        |
| 68               | 12-2 | JinYan        | PuYang, SiChuan  | 491                                    | 889                                    | 1010                                    | H1        |
| 69               | 12-3 | JinYan        | PuYang, SiChuan  | 491                                    | 889                                    | 1010                                    | H1        |
| 70               | 12-4 | JinYan        | PuYang, SiChuan  | 491                                    | 889                                    | 1010                                    | H1        |
| 71               | 12-5 | JinYan        | PuYang, SiChuan  | 491                                    | 889                                    | 1010                                    | H1        |
| 72               | 12-6 | JinYan        | PuYang, SiChuan  | 491                                    | 889                                    | 1010                                    | H1        |
